# Supplementary material
Source: PubMed Central journal article supplement (PMC3037169)

**Supplemental Figure 1.** Representative low-power photomicrograph of POA GnRH /FOS labeling following an injection of kisspeptin. The tissue shown was taken from an OVX female Syrian hamster following 4nmol kisspeptin administration at ZT 11. Filled arrows indicate FOS-expressing GnRH neurons whereas the blank arrow indicates a GnRH neuron not expressing FOS. *Inset*, high-power photomicrograph of the outlined GnRH neuron in the low-power image.

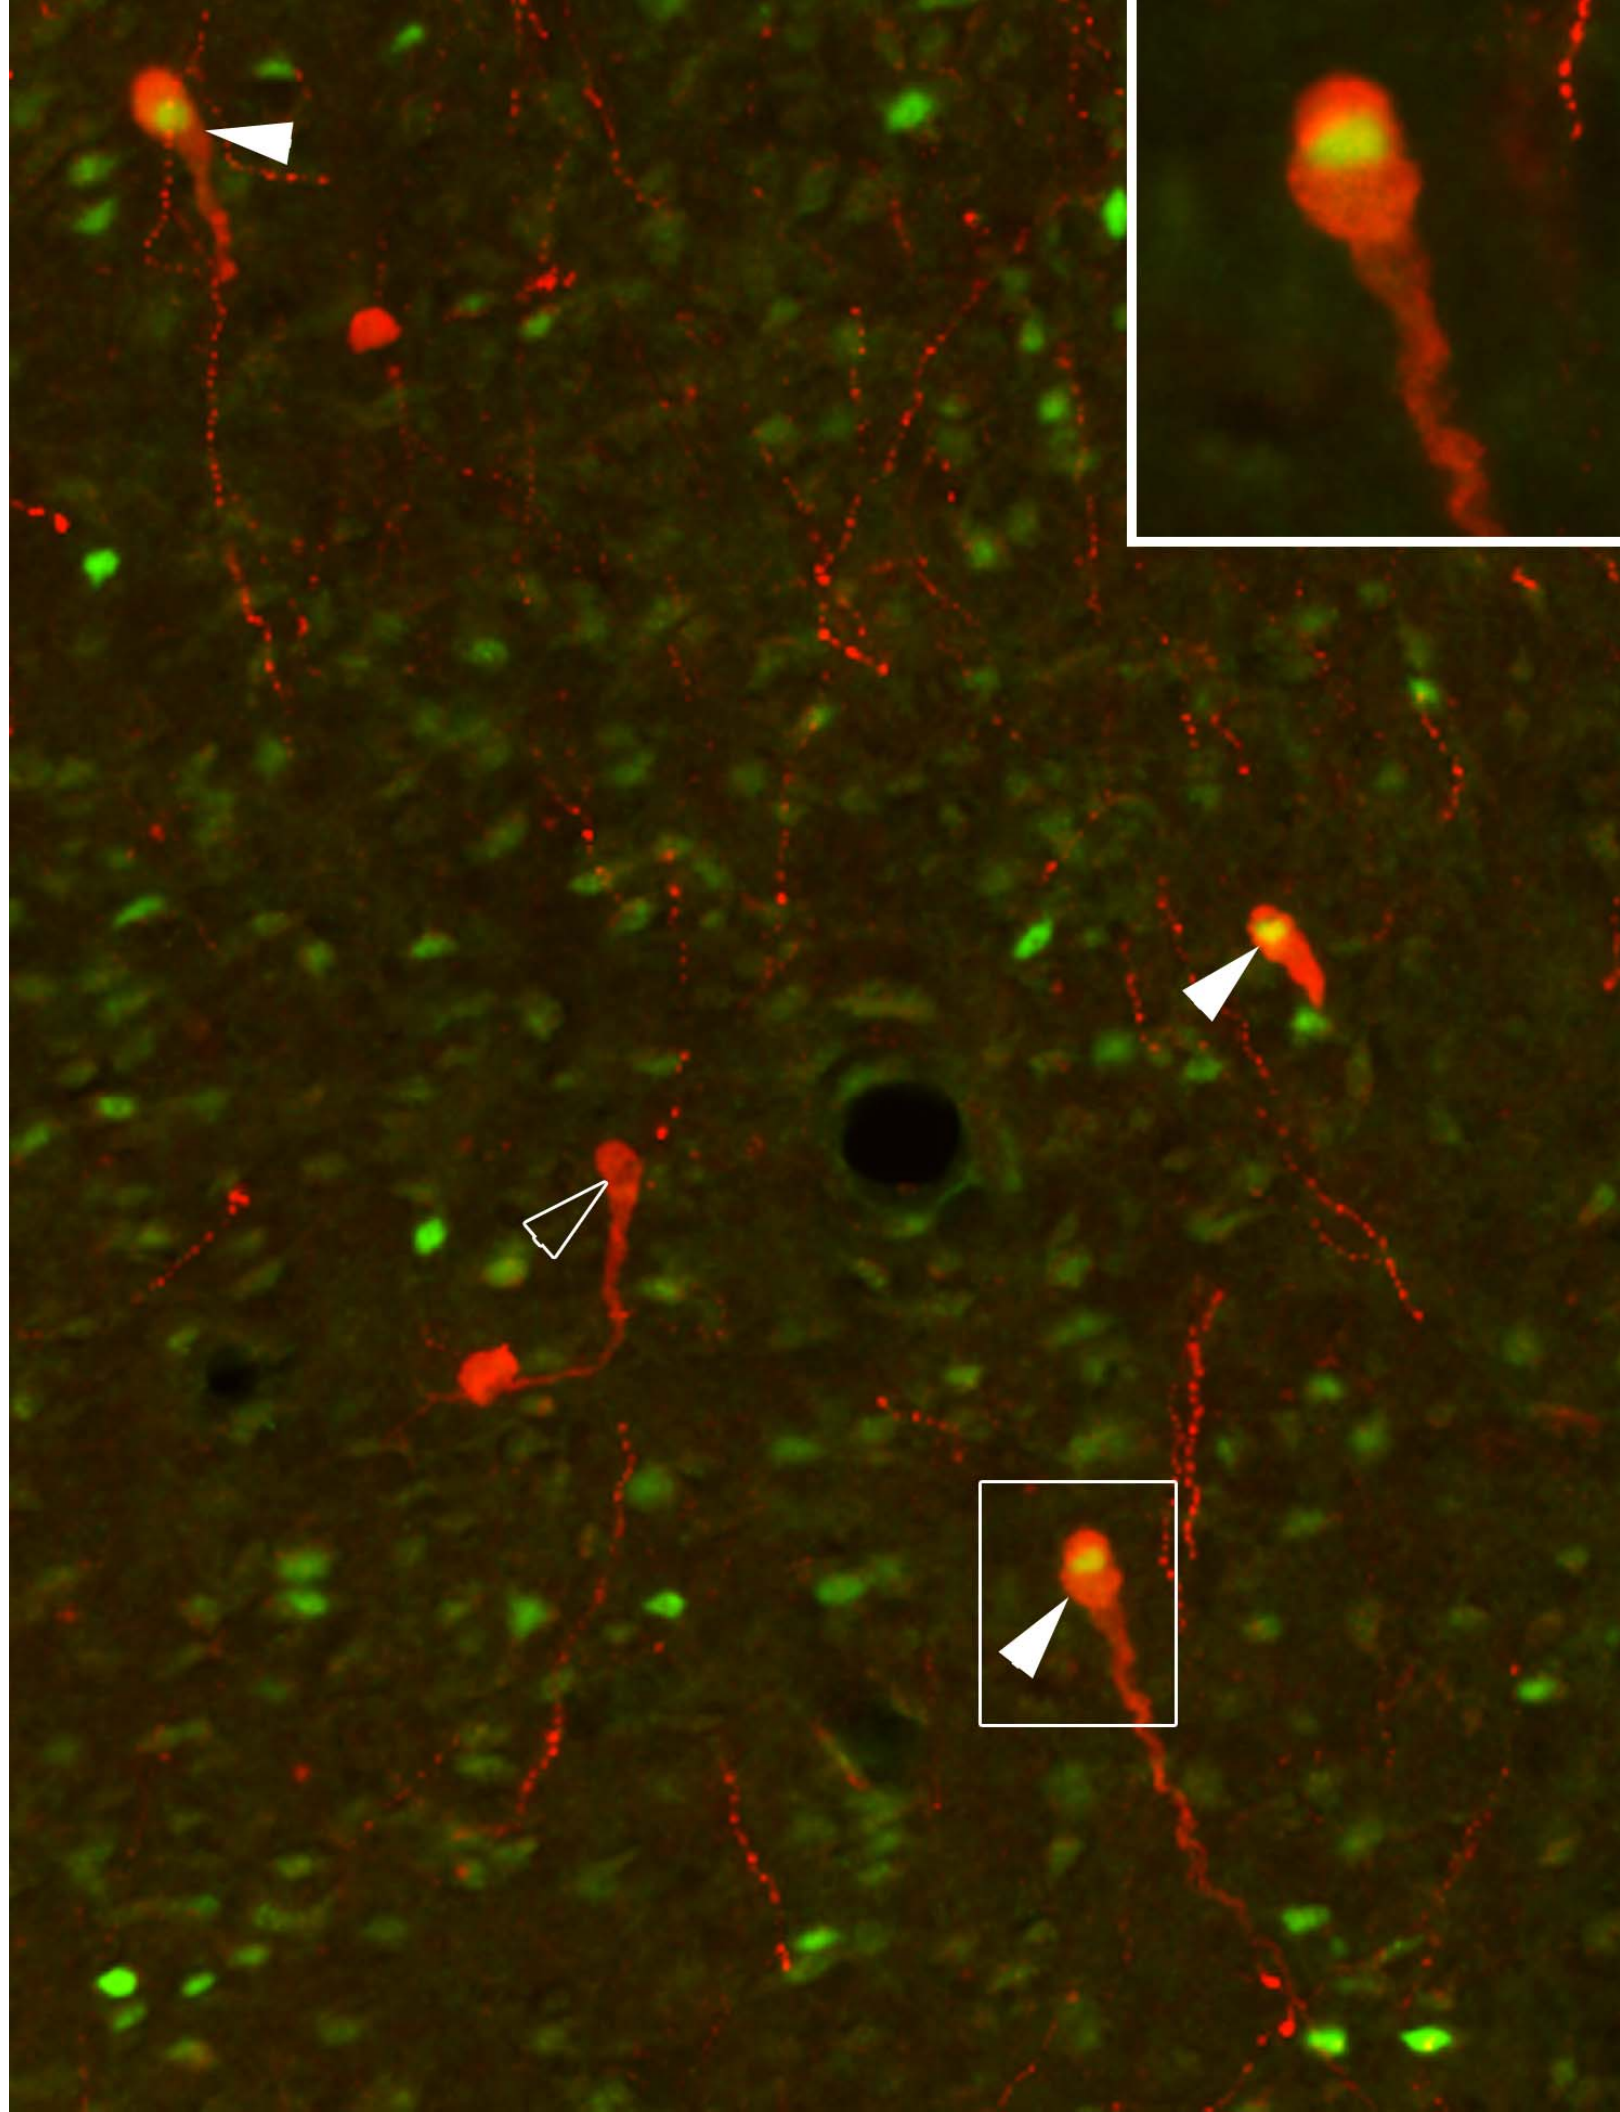

Supplement: en.2010-0943_1.pdf [file en.2010-0943_1.pdf]
